# Optimised assembly of DNA-lipid nanostructures

Es Darley<sup>1</sup>, Pietro Ridone<sup>1</sup>, Jasleen Kaur Daljit Singh<sup>2,3,4</sup>, Shelley F. J. Wickham<sup>2,4,5</sup> and Matthew A. B. Baker<sup>1,6,\*</sup>

<sup>1</sup> UNSW Sydney, School of Biotechnology and Biomolecular Science, 2052 Kensington, Australia

<sup>2</sup> University of Sydney, School of Chemistry, 2006 Camperdown, Australia;

<sup>3</sup> University of Sydney, School of Chemical and Biomolecular Engineering, 2006 Camperdown, Australia;

<sup>4</sup> University of Sydney, Sydney Nanoscience Institute, 2006 Camperdown, Australia;

<sup>5</sup> University of Sydney, School of Physics, 2006 Camperdown, Australia;

<sup>6</sup> CSIRO Synthetic Biology Future Science Platform, GPO Box 2583, Brisbane, QLD 4001, Australia

\* Correspondence: [matthew.baker@unsw.edu.au](mailto:matthew.baker@unsw.edu.au).

## Abstract

Liposomes, aqueous vesicles enclosed by lipid bilayers, are widely used in research as simple, synthetic analogues of cell membranes. Membrane-binding DNA nanostructures have been developed which can modify the shape, porosity and reactivity of liposomes. Lipid-DNA binding is moderated using strands with hydrophobic or amphipathic chemical groups such as cholesterol. However, the factors that affect the binding interactions of cholesterol-modified DNA and membrane bilayers have not been systematically investigated. Here we characterise the effect of buffer and lipid composition and DNA structure near the cholesterol motif on the strength of DNA-lipid binding. We observed that DNA-membrane binding is inhibited at increasing ionic concentrations and that binding is severely reduced in strongly acidic conditions. Background membrane cholesterol content demonstrated a more varied effect, dependent on lipid composition. The composition of the DNA, whether simplex or duplex, showed little effect on binding, as did the presence or absence of a single-stranded 'overhang' to protect the cholesterol and prevent DNA strand aggregation. Our results inform the design and modelling of the membrane binding of cholesterolated DNA nanostructures.

## 32 **Introduction**

33

34 Liposomes are aqueous vesicles bound by one or more bilayers of lipids, a diverse group of  
35 amphipathic and hydrophobic small molecules. Due to their similarities to membrane bilayers,  
36 which are ubiquitous in nature and form the basis of biological compartmentalisation,  
37 liposomes have proven a powerful research tool for modelling cellular membranes in simplified  
38 synthetic systems. Liposomes can also be used for encapsulating therapeutic payloads in order  
39 to increase a drug's circulation time and alter its distribution profile (Storm and Crommelin,  
40 1998). Various strategies for engineering liposomes for therapeutic applications have been  
41 developed in order to increase circulation time, allow targeted payload release or deliver a  
42 payload to a cell's cytosol (Dou et al., 2017; Veronese and Harris, 2002). A number of  
43 liposome-encapsulated 'nanodrugs' are FDA-approved (Bulbake et al., 2017).

44 DNA nanotechnology is a 'bottom-up' approach to designing and building nanometre-scale  
45 structures based on DNA based on Watson-Crick base pairing (Seeman and Sleiman, 2018).  
46 Since the development of DNA nanotechnology (Seeman, 1982), a variety of two and three-  
47 dimensional structures have been created and described (Wang et al., 2017) as well as  
48 environment-sensing mechanisms which allow DNA nanostructures to change state in response  
49 to an external trigger (Singh et al., 2018).

50 DNA and lipid nanotechnologies can be combined by modifying DNA with hydrophobic  
51 chemical groups such as cholesterol to enable membrane binding (Bell and Keyser, 2014).  
52 Using this approach, a variety of membrane-binding and membrane-spanning DNA  
53 nanostructures have been developed (Darley et al., 2019). Membrane-binding DNA  
54 nanostructures have been used to functionalise liposome surfaces (Akbari et al., 2017), control  
55 the shape of liposomes by inducing membrane curvature and tubulation (Franquelim et al.,  
56 2018; Grome et al., 2018) and form membrane-spanning nanopores (Burns et al., 2013;  
57 Langecker et al., 2012). Such nanopores can have dimensions which exceed those of natural  
58 protein pores (Diederichs et al., 2019) and feature gating mechanisms that can be triggered  
59 externally (Burns et al., 2016; Mendoza et al., 2017).

60

61 Despite the widespread use of cholesterol for DNA-lipid mediation, little is known about the  
62 kinetics and energetics of DNA nanostructure insertion in bilayers (Darley et al., 2019).  
63 Increasing the efficiency of membrane attachment is thus of great interest to the design and  
64 application of membrane-bound DNA nanostructures. In particular, currently large numbers of  
65 hydrophobic groups are necessary for spontaneous and stable membrane insertion to occur  
66 (Krishnan et al., 2016), and to overcome the substantial energy penalties associated with the  
67 insertion of membrane-spanning DNA nanopores (Göpfrich et al., 2016). It has been observed  
68 that both the quantity and position of TEG-cholesterol anchors on DNA nanostructures affects  
69 their affinity for lipid bilayers (Khmelniskaia et al., 2016; Langecker et al., 2012). Monovalent  
70 and divalent cations are necessary buffer components in order to assemble and maintain the  
71 stability of DNA duplexes and nanostructures (Kielar et al., 2018; Nakano et al., 1999), yet  
72 also are also known to affect the physical characteristics of membrane bilayers (Böckmann et  
73 al., 2003; Velikonja et al., 2013) and may affect the binding activity of cholesterol-modified

74 DNA. Thus far, the optimal environmental conditions to promote binding interactions between  
75 cholesterol-modified DNA and have not been systematically investigated.

76 Here we have quantified the binding of cholesterol-modified DNA strands to synthetic  
77 liposomes using fluorescence microscopy. We examined the effects of pH, ion concentration  
78 and membrane cholesterol content on the binding of cholesterol-modified DNA strands to  
79 liposomes. We investigated three types of DNA motif: a single stranded form, a duplex, and a  
80 duplex with a short ssDNA 'overhang' proximal to the cholesterol group, recently proposed by  
81 Ohmann et al. to reduce aggregation during nanostructure assembly (Ohmann et al., 2019).

## 82 **Materials and Methods**

### 83 *Preparation of Buffers and solutions*

84 In order to investigate the effect of salts on DNA/Lipid interaction, Liposomes and DNA stocks  
85 were diluted in Liposome Buffer (210 mM D-Sorbitol [**S1876, Sigma**], 5 mM Tris-HCl  
86 [**T3253, Sigma**], pH 7.5) containing NaCl [AJA465, Ajax-Finechem] (12.5 mM to 400 mM)  
87 and MgCl<sub>2</sub> [AJA296, Ajax-Finechem] (0 mM to 80 mM) as required.

88 To investigate the effect of pH on DNA/Lipid interaction we used a modified Liposome Buffer  
89 (210 mM D-Sorbitol, 100 mM NaCl) with pH adjusted to approximate pH values of 2, 4, 6, 7,  
90 8 and 10. The pH was adjusted to +/- 0.2 of the target pH value by using 200 mM NaOH or  
91 HCl 3 hours prior to imaging.

92

| Buffer                                | Composition                                                                  |
|---------------------------------------|------------------------------------------------------------------------------|
| Slide buffer                          | 100 mM NaCl, 10 mM Tris-HCl, pH 7.5                                          |
| DNA duplex buffer                     | 100 mM NaCl, 5 mM Tris-HCl, pH 7.5                                           |
| Electroformation buffer               | 210 mM sorbitol, pH 7.5                                                      |
| Extrusion buffer [Standard]           | 210 mM sorbitol, 100 mM NaCl, 5 mM Tris-HCl, pH 7.5                          |
| Extrusion buffer [NaCl]               | 210 mM sorbitol, X mM NaCl, 5 mM Tris-HCl, pH 7.5                            |
| Extrusion buffer [MgCl <sub>2</sub> ] | 210 mM sorbitol, 100 mM NaCl, X mM MgCl <sub>2</sub> , 5 mM Tris-HCl, pH 7.5 |
| Extrusion buffer [pH]                 | 210 mM sorbitol, 100 mM NaCl, pH X                                           |

93

### 94 *Design and assembly of oligonucleotides and DNA duplexes*

95 DNA strands used for colocalisation experiments were 23 nt-long, used alone (ssDNA), or  
96 hybridised to a complimentary oligo (dsDNA) or a complimentary sequence with a 5' 6 nt  
97 single stranded 'overhang' (dsDNA-6 nt) (Supplementary Table 1). The oligonucleotide  
98 sequences were generated using NUPACK design software (Zadeh et al., 2011) and selected

99 to prevent the formation of unwanted secondary structures. The 6 nt 'overhang' sequence  
100 introduced at the 5' end of oligos was chosen from Ohmann, et al., 2019. Oligos were modified  
101 at the 3' end with a tetraethylene glycol cholesterol moiety (TEG-cholesterol) and with a 5'  
102 Alexa 647 fluorescent group respectively. All oligos were purchased from IDT (Integrated  
103 DNA Technologies, Inc., USA).

104 DNA stocks (100  $\mu$ M, 1000x) were prepared using MilliQ water [Milli-Q, Millipore] and  
105 stored at 4°C. Alexa 647-labelled DNA was stored in foil at -20°C. DNA duplexes were  
106 annealed at 10  $\mu$ M final concentration in duplex buffer. All oligos were heated to 90°C for five  
107 minutes then cooled in a thermocycler at 5°C /minute for 15 minutes to a final temperature of  
108 15°C, then stored at 4°C. For duplex assembly, unmodified complementary strands were added  
109 in a 3-fold excess. DNA was diluted in extrusion buffer to a final concentration of 100 nM after  
110 the melting and annealing steps.

### 111 *Preparation of Liposomes*

112 Liposomes were produced from two main lipid mixtures, DOPE/DOPC liposomes [49.9% 1-  
113 palmitoyl-2-oleoyl-sn-glycero-3-phosphoethanolamine (DOPE 18:1, 850725 P, Avanti),  
114 49.9% 1-palmitoyl-2-oleoyl-glycero-3-phosphocholine (DOPC 18:1, 850375 P, Avanti)] or  
115 DPhPC liposomes [99.8% 1,2-diphytanoyl-sn-glycero-3-phosphocholine (DPhPC 850356P  
116 Avanti Polar Lipids)] (Supplementary Table 2). Both lipid mixtures were doped with 0.1%  
117 PE-rhodamine [1,2-dioleoyl-sn-glycero-3-phosphoethanolamine-N-lissamine rhodamine B  
118 sulfonyl, 810150P Avanti Polar Lipids] for fluorescence imaging and 0.1% PE-biotin [1,2-  
119 dioleoyl-sn-glycero-3-phosphoethanolamine-N-biotinyl, 870282P Avanti Polar Lipids] for  
120 surface tethering. All percentages indicate weight to weight ratios.

121 Liposomes with cholesterol were prepared by replacing either DPhPC or equal parts of DOPE  
122 and DOPC with cholesterol [700000P Avanti Polar Lipids]. All lipids stocks were dissolved in  
123 chloroform at 10 mg/mL and stored at -20 °C.

124 Large unilamellar vesicles (LUVs) were produced by extrusion using a Mini-Extruder kit  
125 (Avanti Polar Lipids Inc., USA). Briefly, lipid stocks were added to a round-bottom glass tube  
126 and dried into under gentle nitrogen flow into a thin film and resuspended in extrusion buffer  
127 to a final concentration of 1 mg/mL by vortex mixing and sonication. The resulting suspension  
128 was transferred to a 500  $\mu$ L glass syringe (Hamilton Company, UK) and passed back and forth  
129 through a 100 nm polycarbonate filter (Whatman plc, USA) 41 times to produce a clear  
130 suspension of homogenous unilamellar liposomes. Liposomes were then diluted 100-fold in  
131 Liposome Buffer solution prior to loading onto tunnel slides for imaging.

132 Giant unilamellar vesicles (GUVs) were produced by electroformation using the Vesicle Prep  
133 Pro machine (Nanion Technologies GmbH, Germany). 30  $\mu$ L of 3.5 mg/mL lipid dissolved in  
134 chloroform was added to a conductive indium tin oxide-coated glass slide and spread over a  
135 spot approximately 12 mm in diameter and allowed to air-dry for two minutes into a circular  
136 film. A 1.5 mm thick rubber gasket of 15 mm diameter was placed around the film, forming a  
137 well into which 250  $\mu$ L of electroformation solution was added. A second indium tin oxide-  
138 coated glass slide was placed face-down on top of the gasket and clamped in place, creating a  
139 sealed chamber of liquid between the two slides. The machine was run using the default  
140 protocol of 3 V AC for 120 minutes to form GUVs. Giant unilamellar liposomes in  
141 electroformation solution were then diluted at a 1:1 ratio in buffer consisting of 210 mM

142 sorbitol, 80 mM NaCl, 10 mM Tris-HCl, giving a final external solution of 210 mM sorbitol,  
143 40 mM NaCl, 5 mM Tris-HCl. Liposome dissolution was tested by titration of increasing  
144 concentration of the detergent Polysorbate-20 (Supplementary Figure 4).

#### 145 *Construction of tunnel slides for microscopy*

146 To form a tunnel slide for imaging DNA-liposome interactions, a 50 mm cover slip (#1  
147 thickness) (Menzel Glaser GmbH) was fixed to a glass slide (Suzhou Upline Medical Products  
148 Co., China (PRC)) using two parallel strips of double-sided tape (Nichiban Co., Japan)  
149 approximately 150  $\mu\text{m}$  thick placed 2 mm apart, forming a channel of approximately 15  $\mu\text{L}$   
150 volume. A thin layer of CoverGrip Coverslip Sealant (Biotium Inc., USA) was applied over  
151 remaining exposed tape to prevent the contamination of solutions by adhesive residue and left  
152 to cure for 24 hours. Solutions were added to one end of the channel with a pipette while  
153 simultaneously drawing solution from the opposite end with an absorbent paper wipe  
154 (Kimberly-Clark Professional, USA).

#### 155 *Tethering of liposomes for TIRF imaging*

156 The imaging system was based on a protocol developed by Jungmann, et al. for DNA-PAINT  
157 super-resolution microscopy of cells (Jungmann et al., 2014), with modifications made to  
158 buffer compositions, volumes and solution concentrations.

159 First, 15  $\mu\text{L}$  of a 9:1 mixture of bovine serum albumin (BSA) and biotinylated bovine serum  
160 albumin (BSA-biotin) in slide buffer at a combined concentration of 1 mg/mL was added to  
161 the channel and incubated for 10 minutes to block and coat the surface of the cover slip. Excess  
162 BSA and BSA-biotin in solution was then removed by flushing 60  $\mu\text{L}$  of slide buffer through  
163 the channel.

164 Next, 15  $\mu\text{L}$  of streptavidin at 0.1 mg/mL in buffer A was added to slide and incubated for 10  
165 minutes. Unbound streptavidin remaining in solution was removed from the slide by flushing  
166 60  $\mu\text{L}$  of extrusion buffer through the slide. Afterwards, 15  $\mu\text{L}$  of biotinylated liposome  
167 solution was introduced into the slide and incubated for 30 minutes to allow streptavidin-biotin  
168 conjugation. Finally, 15  $\mu\text{L}$  of Alexa 647-labelled DNA solution (100 nM) in extrusion buffer  
169 was added to the slide and incubated for 30 minutes prior to imaging.

#### 170 *Fluorescence microscopy of extruded liposomes (Large Unilamellar Vesicles)*

171 Surface-tethered liposomes were imaged using on a Zeiss Elyra PALM/SIM Microscope in  
172 Total Internal Reflection Fluorescence (TIRF) mode with a 63x/1.4 Oil Iris M27 oil immersion  
173 objective (Carl Zeiss AG, Germany) and Andor iXon 897 EMCCD camera (Oxford  
174 Instruments, United Kingdom).

175 Two-channel images were collected to visualize the fluorescence from liposomes ('liposome  
176 channel', 561 nm laser) and fluoreophore-tagged DNA ('DNA channel', 642 nm). Signal in the  
177 'liposome channel' was imaged using an emission dichroic filter (570-650 nm band pass plus  
178 750 nm long pass) with a camera integration time of 100 ms and line averaging of two. The  
179 'DNA channel' was imaged using an emission dichroic filter (655 nm long pass) with a camera  
180 integration time of 33 ms and line averaging of two.



## 181 *Fluorescence microscopy of electroformed liposomes (Giant Unilamellar Vesicles)*

182 Binding interactions between DNA fluorophores and the surface of micron-scale GUVs were  
183 imaged using a Leica TCS SP8 DLS confocal microscope with a HC PL APO CS2 63 x oil  
184 immersion objective lens and Acousto-Optical Beam Splitter, a programmable crystal-based  
185 beam splitter (Leica Microsystems GmbH, Germany). Two-channel images were acquired  
186 showing Liposomes and DNA. In channel one, Rhodamine B-labelled liposomes were excited  
187 with a 561 nm laser and imaged between 569-611 nm. In channel two, DNA labelled with was  
188 excited with a 640 nm laser and imaged between 690-734 nm.

## 189 *Quantifying DNA-liposome colocalisation*

190 A custom macro script was developed using FIJI in ImageJ (Schindelin et al., 2012) to quantify  
191 the colocalisation of DNA and liposomes using a method inspired by Manders Overlap  
192 Coefficient (Dunn et al., 2011). Briefly, the pixel intensity data for the 'liposome channel' of  
193 all images within a dataset comprised of two-channel images (representative of a single  
194 experimental condition) was aggregated and analysed to determine the pixel intensity threshold  
195 used to define the boundary of liposomes against the slide background (Supplementary  
196 Methods, Supplementary Fig. 1). A unique binary mask of the liposome channel was then  
197 generated based on this threshold for each image in the dataset to separate liposome-covered  
198 section from the background. The method used showed no bias or correlation with liposome  
199 area (percentage coverage), in comparison with Pearson's correlation, which did  
200 (Supplementary Fig. 2/3).

201 The mean pixel intensities of the DNA channel for each of these two sections was then  
202 compared to produce a ratiometric colocalisation score,  $C$ , indicating the relative fluorescent  
203 intensity of DNA attached to liposomes (within the binary mask) compared to the fluorescence  
204 of DNA in the background of the image (outside the binary mask). For example, a  
205 colocalisation score of  $C = 1$  is indicative of an image where DNA fluorescence is evenly  
206 distributed across both sections and therefore displays an equal mean pixel intensity in both  
207 channels.

## 208 **Results**

### 209 **Characterisation of DNA-liposome interactions through colocalisation analysis**

210 We immobilised a 100-fold dilution of extruded liposomes on the surface of a coverslip using  
211 biotin-avidin conjugation (Figure 1). Fluorescent DNA colocalised with fluorescent liposomes  
212 only when cholesterol tags were present (Figure 1e-h). DNA without a cholesterol tag did not  
213 colocalise with liposomes and was distributed evenly throughout the image independently of  
214 the position of liposomes (Figure 1a-d). The role of cholesterol tags in causing DNA-liposome  
215 colocalisation was further verified by confocal images of cholesterol-tagged DNA colocalising  
216 with giant unilamellar vesicles, while DNA with no cholesterol tag did not colocalise with  
217 liposomes (Figure 1d/1h)

218 We quantified the colocalisation of DNA to extruded liposomes by determining a  
219 colocalisation score. The liposome channel was first converted into a binary image according  
220 to a standardised pixel intensity threshold (SI). This binary image of the liposome channel was

221 then used as a mask to divide the DNA channel into two sections: liposome and background,  
222 which were used to calculate a colocalisation score via:

223

224

$$C = \frac{D}{B}$$

225

226 Where C is the reported colocalisation score, D is the mean pixel intensity of the fluorescent  
227 DNA in the liposome region of the DNA channel, and B is the mean pixel intensity of the  
228 fluorescent DNA in the background region of the DNA channel (Figure 1).

229

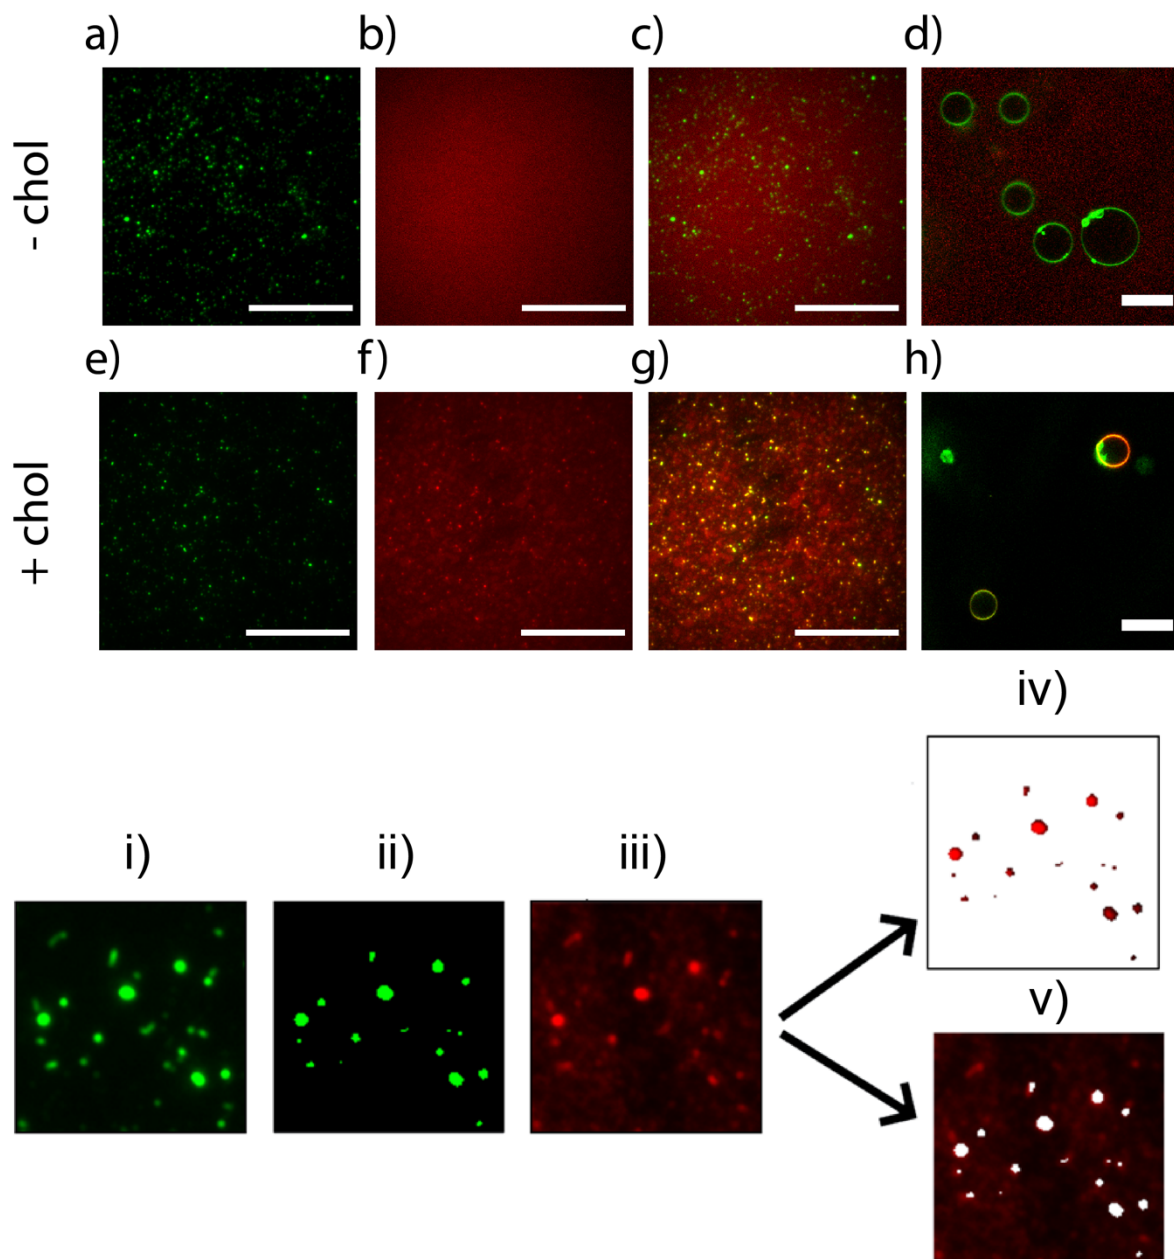

230

231

232 *Figure 1: Image acquisition and analysis of DNA-liposome interactions with fluorescence*  
233 *microscopy. Top row – without cholesterol: DNA (a) rhodamine-doped liposomes, (b)*

234 *Alexa647-DNA (c) merge. (d) GUVs + Alexa647-DNA visualised using confocal fluorescence.*  
235 *Second row – with cholesterol (e) rhodamine-doped liposomes, (f) Alexa647-DNA, (g) merge,*  
236 *(h) GUVs + Alexa647 DNA. Bottom row: Image analysis process for quantifying DNA-*  
237 *liposome colocalization: the image of rhodamine-doped liposomes (i) is converted into a*  
238 *binary mask (ii). This mask is then used to partition the Alexa647-DNA image (iii) into two*  
239 *sections: liposomes (iv) and background (v). The mean pixel intensity of DNA in the liposome*  
240 *section (iv) is divided by the mean pixel intensity of DNA in the background section (v) to give*  
241 *a ratiometric colocalisation score. Scale bars: 20  $\mu$ m.*

242

## 243 **The effect of solution composition on DNA-liposome colocalisation**

244 We investigated the effect of common DNA origami buffer components on the interactions of  
245 cholesterol-tagged DNA and lipid bilayers by quantifying the colocalisation of DNA and  
246 unilamellar liposomes in various conditions. For each condition, the co-localisation of ssDNA,  
247 dsDNA and dsDNA-6 nt was measured in order to compare the overall binding yield for each  
248 DNA configuration. Tests were repeated for 1:1 DOPE/DOPC liposomes and DPhPC  
249 liposomes to detect for lipid-dependant responses to variables.

250 Imaging DNA-liposome interactions in extrusion buffer [NaCl] containing between 12.5 and  
251 400 mM NaCl and extrusion buffer [MgCl<sub>2</sub>] containing between 0 and 80 mM MgCl<sub>2</sub> revealed  
252 that both salts had a significant impact on DNA-liposome colocalisation. The colocalisation of  
253 cholesterol-tagged DNA and liposomes was inhibited at increasing concentrations of NaCl  
254 (Figure 2 A & B) and MgCl<sub>2</sub> (Figure 2 C & D). For all three configurations of cholesterol-  
255 tagged DNA on both DOPE/DOPC liposomes and DPhPC liposomes, a significant decrease  
256 was observed in colocalisation scores between 12.5 mM and 400 mM NaCl ( $P < 0.05$ ) and  
257 between 0 mM and 80 mM MgCl<sub>2</sub> ( $P < 0.05$ ). Linear regression analysis for all three  
258 configurations on both 1:1 DOPE/DOPC liposomes and DPhPC liposomes showed a  
259 significant ( $P < 0.05$ ) trend of decreasing co-localisation scores with increasing NaCl and  
260 MgCl<sub>2</sub> concentration.

261 Imaging DNA-liposome interactions in extrusion buffer adjusted to approximate pH values of  
262 2, 4, 6, 7, 8 and 10 showed that the colocalisation of cholesterol-tagged DNA and liposome  
263 was inhibited in highly acidic conditions. At pH 2, the colocalisation of all three configurations  
264 of cholesterol-tagged DNA with both DOPE/DOPC liposomes (Figure 2e) and DPhPC  
265 liposomes (Figure 2f) was strongly inhibited and significantly less than at all other pH values  
266 ( $P < 0.05$ ). For DOPE/DOPC liposomes, all configurations of cholesterol-tagged DNA  
267 produced similar colocalisation scores at pH values between 4 and 10. For DPhPC liposomes,  
268 cholesterol-tagged dsDNA showed increased binding at moderately acidic conditions which  
269 decreased with increasing pH, while ssDNA and dsDNA-6 nt showed similar binding at all pH  
270 values between 4 and 10.

271

272 DNA that was evenly distributed throughout a slide independently of liposome location would  
273 be expected to produce a colocalisation score of approximately 1.0, while membrane-binding  
274 DNA should produce a colocalisation score greater than 1.0. In the absence of cholesterol tags,  
275 we did not detect any significant colocalisation of DNA and liposomes at any NaCl  
276 concentration or pH value. For MgCl<sub>2</sub>, no significant colocalisation of DNA with no cholesterol



277 tag was observed in 19 out of 20 samples. The remaining sample, ssDNA with no cholesterol  
 278 tag on DOPE/DOPC liposomes at 40 mM, produced a colocalisation score of  $C = 1.01$ ,  
 279 significantly greater than one ( $P < 0.05$ ) but far below those produced by cholesterol-tagged  
 280 DNA (mean: 1.63 range: 1.18-2.12).  
 281

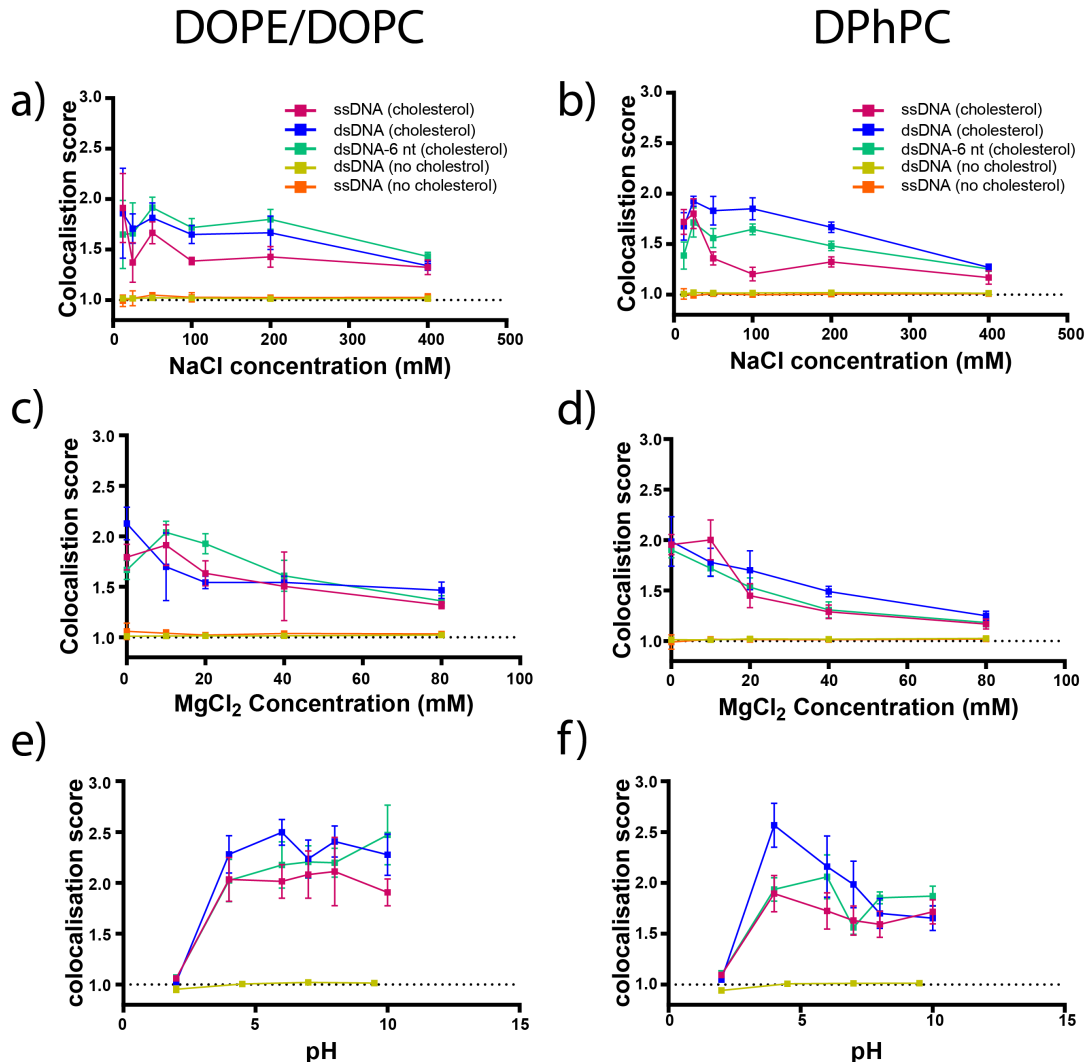

282  
 283 *Figure 2: The effect of NaCl, MgCl<sub>2</sub> and pH on DNA-liposome colocalisation. Colocalisation*  
 284 *scores and standard deviations are shown for Alexa647-labelled cholesterol-tagged single*  
 285 *stranded DNA (ssDNA, pink), cholesterol-tagged double stranded DNA (dsDNA, blue) and*  
 286 *cholesterol-tagged double stranded DNA with a 6 nt overhang (dsDNA-6nt, green) as well as*  
 287 *dsDNA with no cholesterol tag (yellow) and ssDNA with no cholesterol tag (orange) and*  
 288 *rhodamine-labelled DOPE/DOPC liposomes (left column, a/c/e) and DPhPC liposomes (right*  
 289 *column, b/d/f). Conditions tested included extrusion buffer [NaCl] containing 12.5, 25, 50, 100,*  
 290 *200 and 400 mM NaCl (a/b), extrusion buffer [MgCl<sub>2</sub>] containing 0, 10, 20, 40 and 80 mM*  
 291 *MgCl<sub>2</sub> (c/d) and extrusion buffer [pH] adjusted to pH values of 2, 4, 6, 7, 8 and 10 (e/f).*

292

### 293 **The effect of DNA configuration on DNA-liposome colocalisation**

294 We compared the binding of cholesterol-tagged DNA in different configurations (ssDNA,  
295 dsDNA and dsDNA-6 nt) across all experiments to assess if one particular DNA configuration  
296 yielded higher colocalisation than other configurations. For each condition and configuration,  
297 12 images and were recorded, giving a total of  $n = 204$  colocalisation scores recorded for each  
298 DNA configuration on each liposome composition.

299 We tested for a difference in means of colocalisation scores for each pair of DNA  
300 configurations. This *t*-test was repeated for both DPhPC liposomes and DOPE/DOPC  
301 liposomes. Our results (Table 1) show there is are significant differences in mean DNA-  
302 liposome colocalisation dependant on DNA configuration. For DOPE/DOPC liposomes, we  
303 found DNA to colocalise in the order  $C_{(dsDNA)} \approx C_{(dsDNA-6\ nt)} > C_{(ssDNA)}$ . For DPhPC liposomes,  
304 we found DNA to bind in the order  $C_{(dsDNA)} > C_{(dsDNA-6\ nt)} > C_{(ssDNA)}$ .

305

| <b>Liposome composition</b> | $\Delta C_{(dsDNA)} C_{(ssDNA)}$ | $\Delta C_{(dsDNA)} C_{(dsDNA-6\ nt)}$ | $\Delta C_{(dsDNA-6\ nt)} C_{(ssDNA)}$ |
|-----------------------------|----------------------------------|----------------------------------------|----------------------------------------|
| DOPE/DOPC liposomes         | 0.157 (P<0.05)                   | 0.0131 (not sig.)                      | 0.144 (P<0.05)                         |
| DPhPC liposomes             | 0.203 (P<0.05)                   | 0.145 (P<0.05)                         | 0.0577 (P<0.05)                        |

306

307 *Table 1: Mean differences in colocalisation scores for different configurations of DNA binding*  
308 *to DOPE/DOPC liposomes and DPhPC liposomes. Results are pooled from data shown in*  
309 *section 4.2. Paired t-tests of colocalisation scores were conducted comparing each DNA*  
310 *configuration pair-wise on both types of liposomes (n = 204) against the hypothesis 'mean*  
311 *difference = 0'. For example, ' $\Delta C_{(dsDNA)} C_{(ssDNA)}$ ' represents the mean difference in*  
312 *colocalisation scores of dsDNA and ssDNA.*

313

### 314 **The effect of membrane cholesterol content on DNA-liposome colocalisation**

315 Colocalisation scores of DNA and liposomes in extrusion buffer showed different trends for  
316 the two lipid mixtures as cholesterol content was increased between 0% and 40% mass. For  
317 DOPE/DOPC liposomes, colocalisation scores of all three configurations of cholesterol-tagged  
318 DNA showed a significant increase between 0% and 40% cholesterol ( $P < 0.05$ ). Linear  
319 regression analysis shows a gradient significantly greater than zero across the observed range  
320 of membrane cholesterol content ( $P < 0.05$ ) (Figure 3A).

321

322 For DPhPC liposomes, colocalisation scores of cholesterol-tagged DNA increased to a  
323 maximum at 10%-20% membrane cholesterol, then decreased as membrane cholesterol content  
324 was increased above this point. All three configurations of cholesterol-tagged DNA (ssDNA,  
325 dsDNA and dsDNA-6 nt) showed both a significant increase in colocalisation between 0% and  
326 20% ( $P < 0.05$ ) and a significant decrease in colocalisation between 20% and 40% ( $P < 0.05$ ).

327 Linear regression analysis for all three configurations showed a slight overall decreasing trend  
328 across the observed range ( $P < 0.05$ ) (Figure 3 B).

329

330 Using the test  $C > 1.0$ , both ssDNA and dsDNA with no cholesterol tag did not show significant  
331 colocalisation with liposomes of any cholesterol content.

332

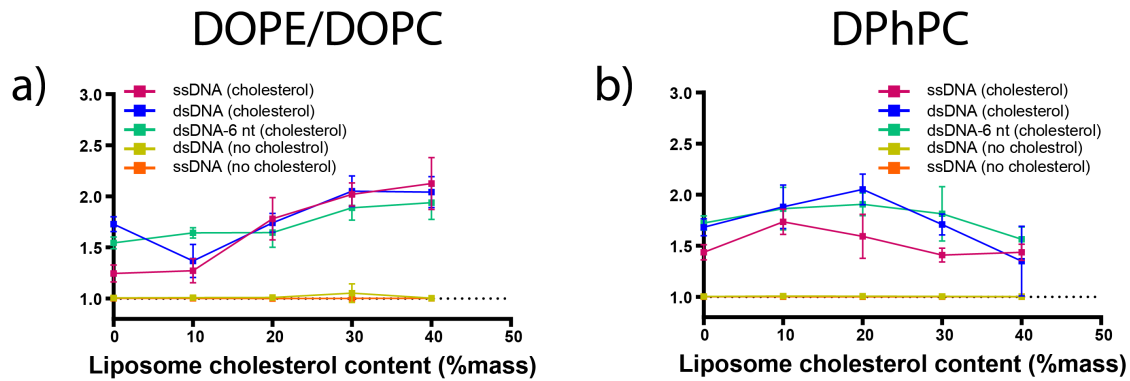

333

334 *Figure 3: The effect of cholesterol content on DNA-liposome concentration. Colocalisation*  
335 *scores and standard deviations are shown for Alexa647-labelled cholesterol-tagged ssDNA*  
336 *(pink), cholesterol-tagged dsDNA (blue) and cholesterol-tagged dsDNA with a 6 nt overhang*  
337 *(green) as well as dsDNA with no cholesterol tag (yellow) and ssDNA with no cholesterol tag*  
338 *(orange) and rhodamine-labelled DOPE/DOPC liposomes (a) or DPhPC liposomes (b)*  
339 *prepared from lipid stocks containing 0, 10, 20, 30 or 40% cholesterol.*

340

## 341 Discussion

### 342 The effect of solution composition on DNA-liposome colocalisation

343 Monovalent ions, divalent ions and pH known to modulate biophysical properties of membrane  
344 bilayers (Sachs et al., 2004) and the structural stability of DNA nanostructures (Douglas et al.,  
345 2009). Divalent cations such as  $Mg^{2+}$  are of particular interest to DNA nanotechnology  
346 applications to stabilise DNA duplexes and are required to facilitate the formation higher-order  
347 nucleic acids structures (Misra and Draper, 1998; Williams et al., 1989). Divalent cations also  
348 maintain the stability of large DNA nanostructures by inhibiting the electrostatic repulsion  
349 between DNA strands and are therefore considered essential in the assembly process (Douglas  
350 et al., 2009; Kielar et al., 2018). The sensitivity of DNA to salt and pH has been harnessed to  
351 design DNA nanostructures able to switch configuration in response to changes in ion  
352 concentration, allowing the development of DNA-based nanosensors (Singh et al.,  
353 2018). Despite these recent advances, the tolerance of DNA nanostructures to low-salt  
354 environments remains variable and design-dependent thus necessitating regular  
355 characterization and optimization (Hahn et al., 2014).

356  
357 We sought to test whether changes to membrane density and diffusivity due to external buffer  
358 would affect cholesterol binding to the non-polar tail-group region of a membrane. Monovalent  
359 cations such as  $Na^+$  and divalent cations such as  $Mg^{2+}$  have been shown via modelling to  
360 promote lipid-lipid binding interactions within a bilayer (Böckmann et al., 2003) and affect the  
361 behaviour of water molecules at the membrane-water interface (Velikonja et al., 2013). The  
362 interaction between surface charges on membrane bilayers and the phosphate groups of DNA  
363 molecules is also affected by divalent cations (Antipina and Gurtovenko, 2016; Binder and  
364 Zschörnig, 2002). This interaction is dependent on the ratio of monovalent to divalent salts  
365 (Budker et al., 1980). In our tests we saw no membrane interactions between non-cholesterol  
366 tagged DNA at any  $MgCl_2$  concentration, suggesting that divalent cation-mediated binding was  
367 negligible under the conditions tested. Coarse-grained and atomistic simulations of DNA-lipid  
368 interactions could lead to a more detailed understanding of the effect of cations on the binding  
369 of DNA (Uusitalo et al., 2015; Yoo and Aksimentiev, 2015).

370  
371 Binding was inhibited in acidic conditions ( $< pH 4$ ). However, otherwise, there was no optimal  
372 pH for liposomes formed from either neutral DPhPC, or DOPE/DOPC, which contains  
373 zwitterionic phosphatidylethanolamine headgroups that are positively charged below pH 3.5  
374 and negatively charged above pH 8 (Tsui et al., 1986). This suggests lipid ionisation does not  
375 play a significant role and variation in pH around physiological pH are not likely to affect  
376 membrane binding of cholesterol-tagged DNA. Hydronium ions ( $H_3O^+$ ) have a similar effect  
377 on lipid bilayers as  $Na^+$  and  $Mg^{2+}$ , and may explain the inhibition of binding in strongly acidic  
378 conditions (Deplazes et al., 2018).

379 For both liposome compositions, the colocalisation of ssDNA and liposomes was significantly  
380 reduced in comparison with double stranded configurations. This suggests the duplex dsDNA  
381 binds better to liposomes. Membrane-bound ssDNA has been observed through Förster  
382 Resonance Energy Transfer (FRET) (Roy et al., 2008) to lie close to the surface of lipid bilayer

383 membranes, while dsDNA remains in a stable position protruding normal to the membrane  
384 surface (Ma et al., 2019). Thus, this improved binding may be due to the greater rigidity of  
385 dsDNA vs ssDNA.

386 The addition of a 6 nt overhang on cholesterol-tagged DNA strands has been postulated to  
387 assist during nanostructure assembly by inhibiting strand aggregation (Ohmann et al., 2019).  
388 We included a 6 nt overhang next to the cholesterol group on our dsDNA strand (dsDNA-6 nt)  
389 and observed a significant decrease in binding only on DPhPC liposomes. Lipid composition  
390 should, therefore, be considered when incorporating overhangs, but there would be no large  
391 penalty from routine incorporation on membrane-targeting nanostructures.

392  
393 The effect of membrane cholesterol on DNA-liposome binding differed between phospholipid  
394 compositions. Cholesterol has been shown to affect the strength, fluidity and permeability of  
395 bilayers (Róg et al., 2009) as well as the organisation of ions and water molecules at the  
396 membrane-bilayer interface (Magarkar et al., 2014). The different response that we observed  
397 between different phospholipid types may be explained by differences in tail-group structure.  
398 Branched chain lipids such as DPhPC occupy a greater area per molecule within a bilayer  
399 compared to linear-chain lipids such as DOPE and DOPC (Tristram-Nagle et al., 2010).

400  
401 Increasing the cholesterol content of lipid mixtures above 20% promoted the binding of DNA  
402 on DOPE/DOPC liposomes but inhibited binding on DPhPC liposomes. This was possibly due  
403 to the lower cholesterol saturation limit of DPhPC compared with DOPE (Huang et al., 1999).  
404 Here we controlled the cholesterol content during liposome preparation but did not quantify  
405 the exact cholesterol content in liposome membranes. Future work using fluorescent markers  
406 or high performance liquid chromatography analysis of liposome samples (Christie, 1985)  
407 could accurately quantify the membrane cholesterol content to better benchmark the role of  
408 cholesterol in DNA-lipid binding, and to account for any loss in cholesterol during liposome  
409 preparation.

## 410 411 **Conclusion**

412  
413 In this work we have characterised the role of salt and pH during the assembly of DNA-  
414 liposome complexes. We tested different lipid species and DNA configurations to screen for  
415 optimal conditions to promote binding of DNA to liposomes. Our results suggest that lipid  
416 type, pH and DNA configuration are the most important parameters to consider when  
417 optimising for the binding of DNA nanostructures to liposomes, whereas mono- and divalent-  
418 salt concentration plays a minor role. These results will be helpful in experimental design and  
419 reagent choice for future experiments combining DNA and lipid nanotechnologies.



420

## 421 **References**

422 Akbari, E., Mollica, M.Y., Lucas, C.R., Bushman, S.M., Patton, R.A., Shahhosseini, M.,  
423 Song, J.W., and Castro, C.E. (2017). Engineering Cell Surface Function with DNA Origami.  
424 *Adv. Mater.* *29*.

425 Antipina, A.Y., and Gurtovenko, A. (2016). Molecular-level insight into the interactions of  
426 DNA with phospholipid bilayers: barriers and triggers. *RSC Adv.* *6*, 36425–36432.

427 Bell, N.A., and Keyser, U.F. (2014). Nanopores formed by DNA origami: a review. *FEBS*  
428 *Lett.* *588*, 3564–3570.

429 Binder, H., and Zschörnig, O. (2002). The effect of metal cations on the phase behavior and  
430 hydration characteristics of phospholipid membranes. *Chem. Phys. Lipids* *115*, 39–61.

431 Böckmann, R.A., Hac, A., Heimburg, T., and Grubmüller, H. (2003). Effect of sodium  
432 chloride on a lipid bilayer. *Biophys. J.* *85*, 1647–1655.

433 Budker, V., Godovikov, A., Naumova, L., and Slepneva, I. (1980). Interaction of  
434 polynucleotides with natural and model membranes. *Nucleic Acids Res.* *8*, 2499–2516.

435 Bulbake, U., Doppalapudi, S., Kommineni, N., and Khan, W. (2017). Liposomal  
436 formulations in clinical use: an updated review. *Pharmaceutics* *9*, 12.

437 Burns, J.R., Stulz, E., and Howorka, S. (2013). Self-assembled DNA nanopores that span  
438 lipid bilayers. *Nano Lett.* *13*, 2351–2356.

439 Burns, J.R., Seifert, A., Fertig, N., and Howorka, S. *%J N. nanotechnology* (2016). A  
440 biomimetic DNA-based channel for the ligand-controlled transport of charged molecular  
441 cargo across a biological membrane. *11*, 152.

442 Christie, W.W. (1985). Rapid separation and quantification of lipid classes by high  
443 performance liquid chromatography and mass (light-scattering) detection. *J. Lipid Res.* *26*,  
444 507–512.

445 Darley, E., Singh, J.K.D., Surace, N.A., Wickham, S.F., and Baker, M.A. (2019). The Fusion  
446 of Lipid and DNA Nanotechnology. *Genes* *10*, 1001.

447 Deplazes, E., Poger, D., Cornell, B., and Cranfield, C.G. (2018). The effect of hydronium  
448 ions on the structure of phospholipid membranes. *Phys. Chem. Chem. Phys.* *20*, 357–366.

449 Diederichs, T., Pugh, G., Dorey, A., Xing, Y., Burns, J.R., Nguyen, Q.H., Tornow, M.,  
450 Tampé, R., and Howorka, S. (2019). Synthetic protein-conductive membrane nanopores built  
451 with DNA. *Nat. Commun.* *10*, 1–11.

452 Dou, Y., Hynynen, K., and Allen, C. (2017). To heat or not to heat: Challenges with clinical  
453 translation of thermosensitive liposomes. *J. Controlled Release* *249*, 63–73.

454 Douglas, S.M., Dietz, H., Liedl, T., Högberg, B., Graf, F., and Shih, W.M. (2009). Self-  
455 assembly of DNA into nanoscale three-dimensional shapes. *Nature* *459*, 414.

- 456 Dunn, K.W., Kamocka, M.M., and McDonald, J.H. (2011). A practical guide to evaluating  
457 colocalization in biological microscopy. *Am. J. Physiol.-Cell Physiol.* *300*, C723–C742.
- 458 Franquelim, H.G., Khmelinskaia, A., Sobczak, J.-P., Dietz, H., and Schwille, P. (2018).  
459 Membrane sculpting by curved DNA origami scaffolds. *Nat. Commun.* *9*, 811.
- 460 Göpfrich, K., Li, C.-Y., Ricci, M., Bhamidimarri, S.P., Yoo, J., Gyenes, B., Ohmann, A.,  
461 Winterhalter, M., Aksimentiev, A., and Keyser, U.F. (2016). Large-conductance  
462 transmembrane porin made from DNA origami. *ACS Nano* *10*, 8207–8214.
- 463 Grome, M.W., Zhang, Z., Pincet, F., and Lin, C. (2018). Vesicle Tubulation with Self-  
464 Assembling DNA Nanosprings. *Angew. Chem. - Int. Ed.* *57*, 5330–5334.
- 465 Hahn, J., Wickham, S.F.J., Shih, W.M., and Perrault, S.D. (2014). Addressing the Instability  
466 of DNA Nanostructures in Tissue Culture. *ACS Nano* *8*, 8765–8775.
- 467 Huang, J., Buboltz, J.T., and Feigenson, G.W. (1999). Maximum solubility of cholesterol in  
468 phosphatidylcholine and phosphatidylethanolamine bilayers. *Biochim. Biophys. Acta BBA-  
469 Biomembr.* *1417*, 89–100.
- 470 Khmelinskaia, A., Franquelim, H.G., Petrov, E.P., and Schwille, P. (2016). Effect of anchor  
471 positioning on binding and diffusion of elongated 3D DNA nanostructures on lipid  
472 membranes. *J. Phys. Appl. Phys.* *49*.
- 473 Kielar, C., Xin, Y., Shen, B., Kostianen, M.A., Grundmeier, G., Linko, V., and Keller, A.  
474 (2018). On the Stability of DNA Origami Nanostructures in Low-Magnesium Buffers.  
475 *Angew. Chem. Int. Ed.* *57*, 9470–9474.
- 476 Krishnan, S., Ziegler, D., Arnaut, V., Martin, T.G., Kapsner, K., Henneberg, K., Bausch,  
477 A.R., Dietz, H., and Simmel, F.C. (2016). Molecular transport through large-diameter DNA  
478 nanopores. *Nat. Commun.* *7*, 12787.
- 479 Langecker, M., Arnaut, V., Martin, T.G., List, J., Renner, S., Mayer, M., Dietz, H., and  
480 Simmel, F.C. (2012). Synthetic lipid membrane channels formed by designed DNA  
481 nanostructures. *Science* *338*, 932–936.
- 482 Ma, D.-F., Xu, C.-H., Hou, W.-Q., Zhao, C.-Y., Ma, J.-B., Huang, X.-Y., Jia, Q., Ma, L.,  
483 Diao, J., Liu, C., et al. (2019). Detecting Single-Molecule Dynamics on Lipid Membranes  
484 with Quenchers-in-a-Liposome FRET. *Angew. Chem.* *131*, 5633–5637.
- 485 Magarkar, A., Dhawan, V., Kallinteri, P., Viitala, T., Elmowafy, M., Róg, T., and Bunker, A.  
486 (2014). Cholesterol level affects surface charge of lipid membranes in saline solution. *Sci.  
487 Rep.* *4*, 5005.
- 488 Mendoza, O., Calmet, P., Alves, I., Lecomte, S., Raoux, M., Cullin, C., and Elezgaray, J.  
489 (2017). A tensegrity driven DNA nanopore. *Nanoscale* *9*, 9762–9769.
- 490 Misra, V.K., and Draper, D.E. (1998). On the role of magnesium ions in RNA stability.  
491 *Biopolym. Orig. Res. Biomol.* *48*, 113–135.
- 492 Nakano, S., Fujimoto, M., Hara, H., and Sugimoto, N. (1999). Nucleic acid duplex stability:  
493 influence of base composition on cation effects. *Nucleic Acids Res.* *27*, 2957–2965.

- 494 Ohmann, A., Göpfrich, K., Joshi, H., Thompson, R.F., Sobota, D., Ranson, N.A.,  
495 Aksimentiev, A., and Keyser, U.F. (2019). Controlling aggregation of cholesterol-modified  
496 DNA nanostructures. *Nucleic Acids Res.* *47*, 11441–11451.
- 497 Róg, T., Pasenkiewicz-Gierula, M., Vattulainen, I., and Karttunen, M. (2009). Ordering  
498 effects of cholesterol and its analogues. *Biochim. Biophys. Acta BBA-Biomembr.* *1788*, 97–  
499 121.
- 500 Roy, R., Hohng, S., and Ha, T. (2008). A practical guide to single-molecule FRET. *Nat.*  
501 *Methods* *5*, 507–516.
- 502 Sachs, J.N., Nanda, H., Petrache, H.I., and Woolf, T.B. (2004). Changes in  
503 phosphatidylcholine headgroup tilt and water order induced by monovalent salts: molecular  
504 dynamics simulations. *Biophys. J.* *86*, 3772–3782.
- 505 Schindelin, J., Arganda-Carreras, I., Frise, E., Kaynig, V., Longair, M., Pietzsch, T.,  
506 Preibisch, S., Rueden, C., Saalfeld, S., Schmid, B., et al. (2012). Fiji - an Open Source  
507 platform for biological image analysis. *Nat. Methods* *9*.
- 508 Seeman, N.C. (1982). Nucleic acid junctions and lattices. *J. Theor. Biol.* *99*, 237–247.
- 509 Seeman, N.C., and Sleiman, H.F. (2018). DNA nanotechnology. *Nat. Rev. Mater.* *3*, 17068.
- 510 Singh, J.K.D., Luu, M.T., Abbas, A., and Wickham, S.F. (2018). Switchable DNA-origami  
511 nanostructures that respond to their environment and their applications. *Biophys. Rev.* *10*,  
512 1283–1293.
- 513 Storm, G., and Crommelin, D.J. (1998). Liposomes: quo vadis? *Pharm. Sci. Technol. Today*  
514 *1*, 19–31.
- 515 Tristram-Nagle, S., Kim, D.J., Akhuzada, N., Kučerka, N., Mathai, J.C., Katsaras, J., Zeidel,  
516 M., and Nagle, J.F. (2010). Structure and water permeability of fully hydrated  
517 diphytanoylPC. *Chem. Phys. Lipids* *163*, 630–637.
- 518 Tsui, Fran.C., Ojcius, D.M., and Hubbell, W.L. (1986). The intrinsic pKa values for  
519 phosphatidylserine and phosphatidylethanolamine in phosphatidylcholine host bilayers.  
520 *Biophys. J.* *49*, 459.
- 521 Uusitalo, J.J., Ingólfsson, H.I., Akhshi, P., Tieleman, D.P., and Marrink, S.J. (2015). Martini  
522 coarse-grained force field: extension to DNA. *J. Chem. Theory Comput.* *11*, 3932–3945.
- 523 Velikonja, A., Perutkova, Š., Gongadze, E., Kramar, P., Polak, A., Maček-Lebar, A., and  
524 Iglič, A. (2013). Monovalent ions and water dipoles in contact with dipolar zwitterionic lipid  
525 headgroups-theory and MD simulations. *Int. J. Mol. Sci.* *14*, 2846–2861.
- 526 Veronese, F.M., and Harris, J.M. (2002). Introduction and overview of peptide and protein  
527 pegylation. *Adv. Drug Deliv. Rev.* *54*, 453–456.
- 528 Wang, P., Meyer, T.A., Pan, V., Dutta, P.K., and Ke, Y. (2017). The beauty and utility of  
529 DNA origami. *Chem* *2*, 359–382.

530 Williams, A.P., Longfellow, C.E., Freier, S.M., Kierzek, R., and Turner, D.H. (1989). Laser  
531 temperature-jump, spectroscopic, and thermodynamic study of salt effects on duplex  
532 formation by dGCATGC. *Biochemistry* 28, 4283–4291.

533 Yoo, J., and Aksimentiev, A. (2015). Molecular dynamics of membrane-spanning DNA  
534 channels: conductance mechanism, electro-osmotic transport, and mechanical gating. *J. Phys.*  
535 *Chem. Lett.* 6, 4680–4687.

536
